# Supplementary material
Source: PubMed Central journal article supplement (PMC2846543)

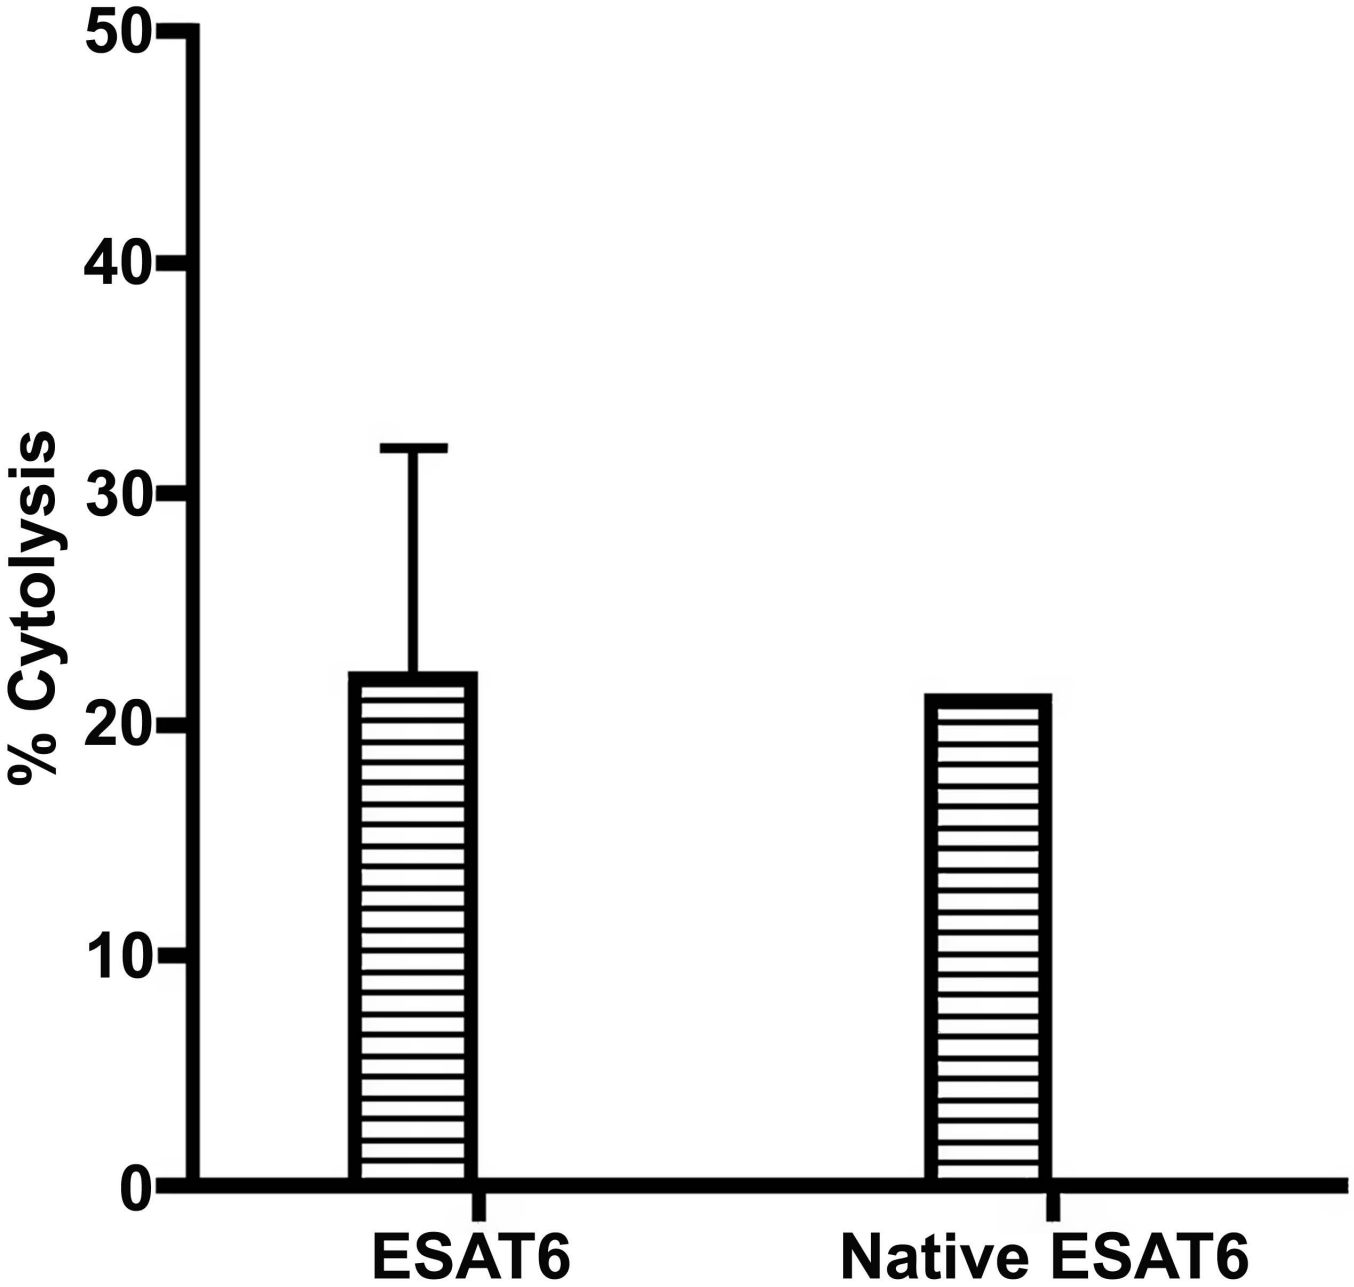

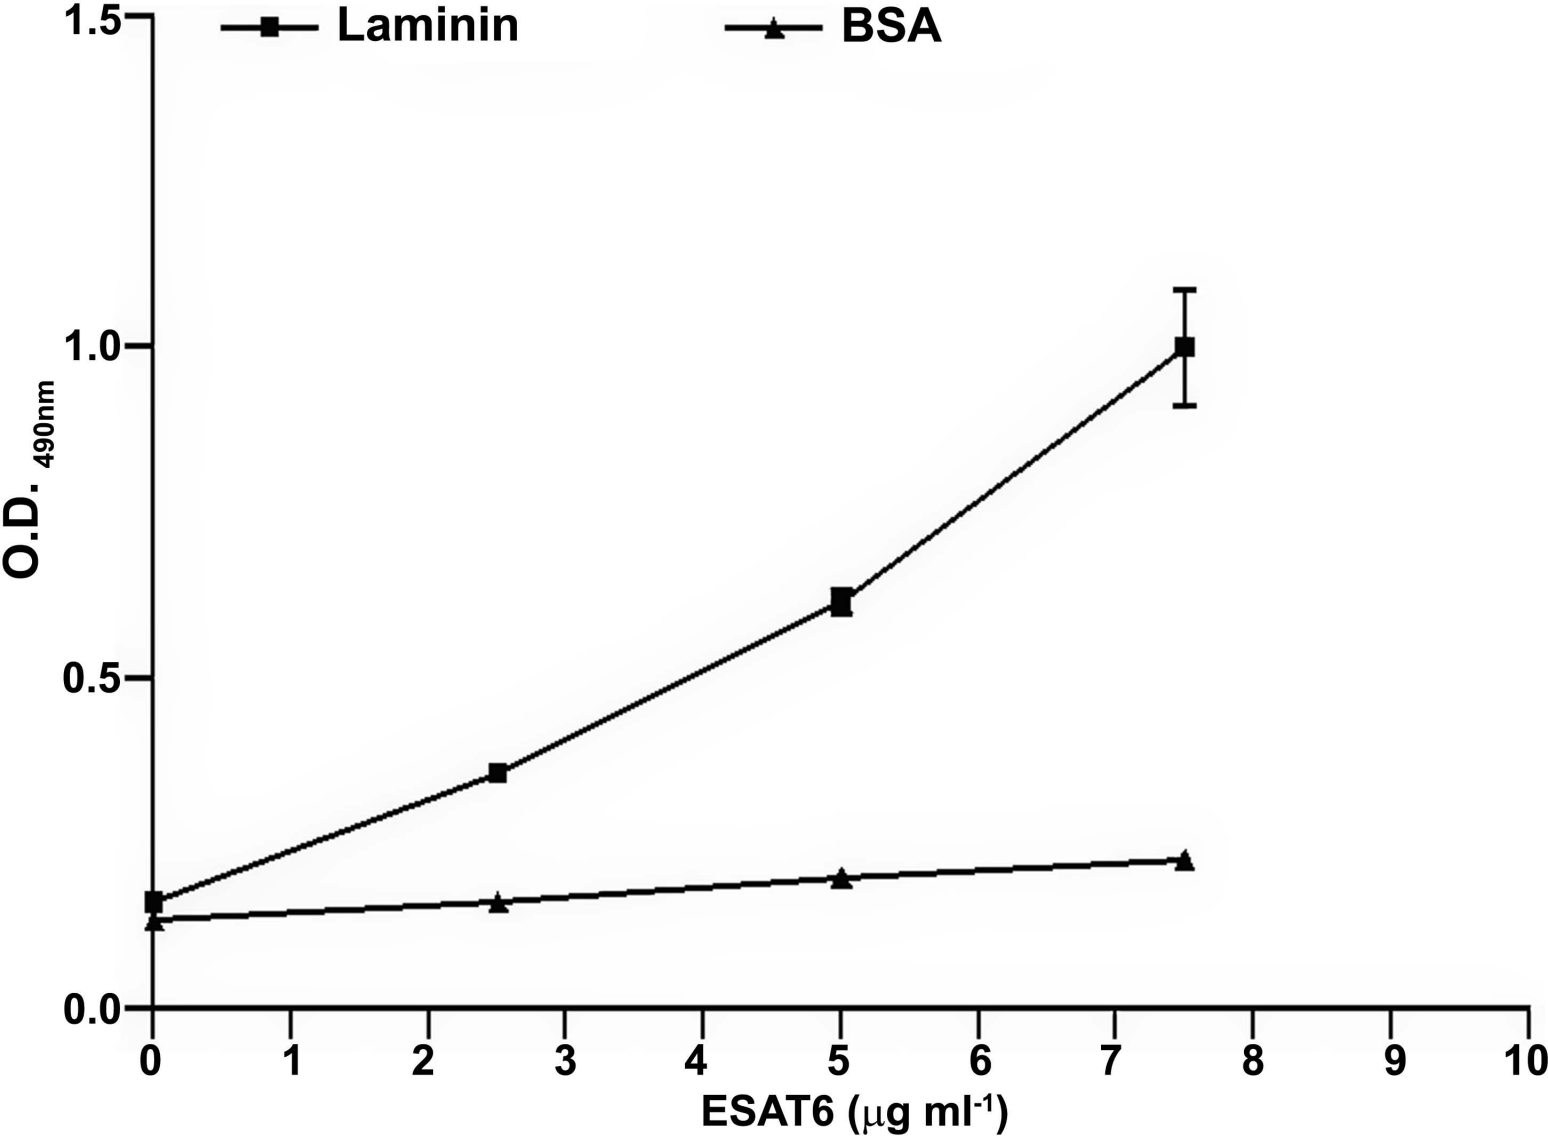

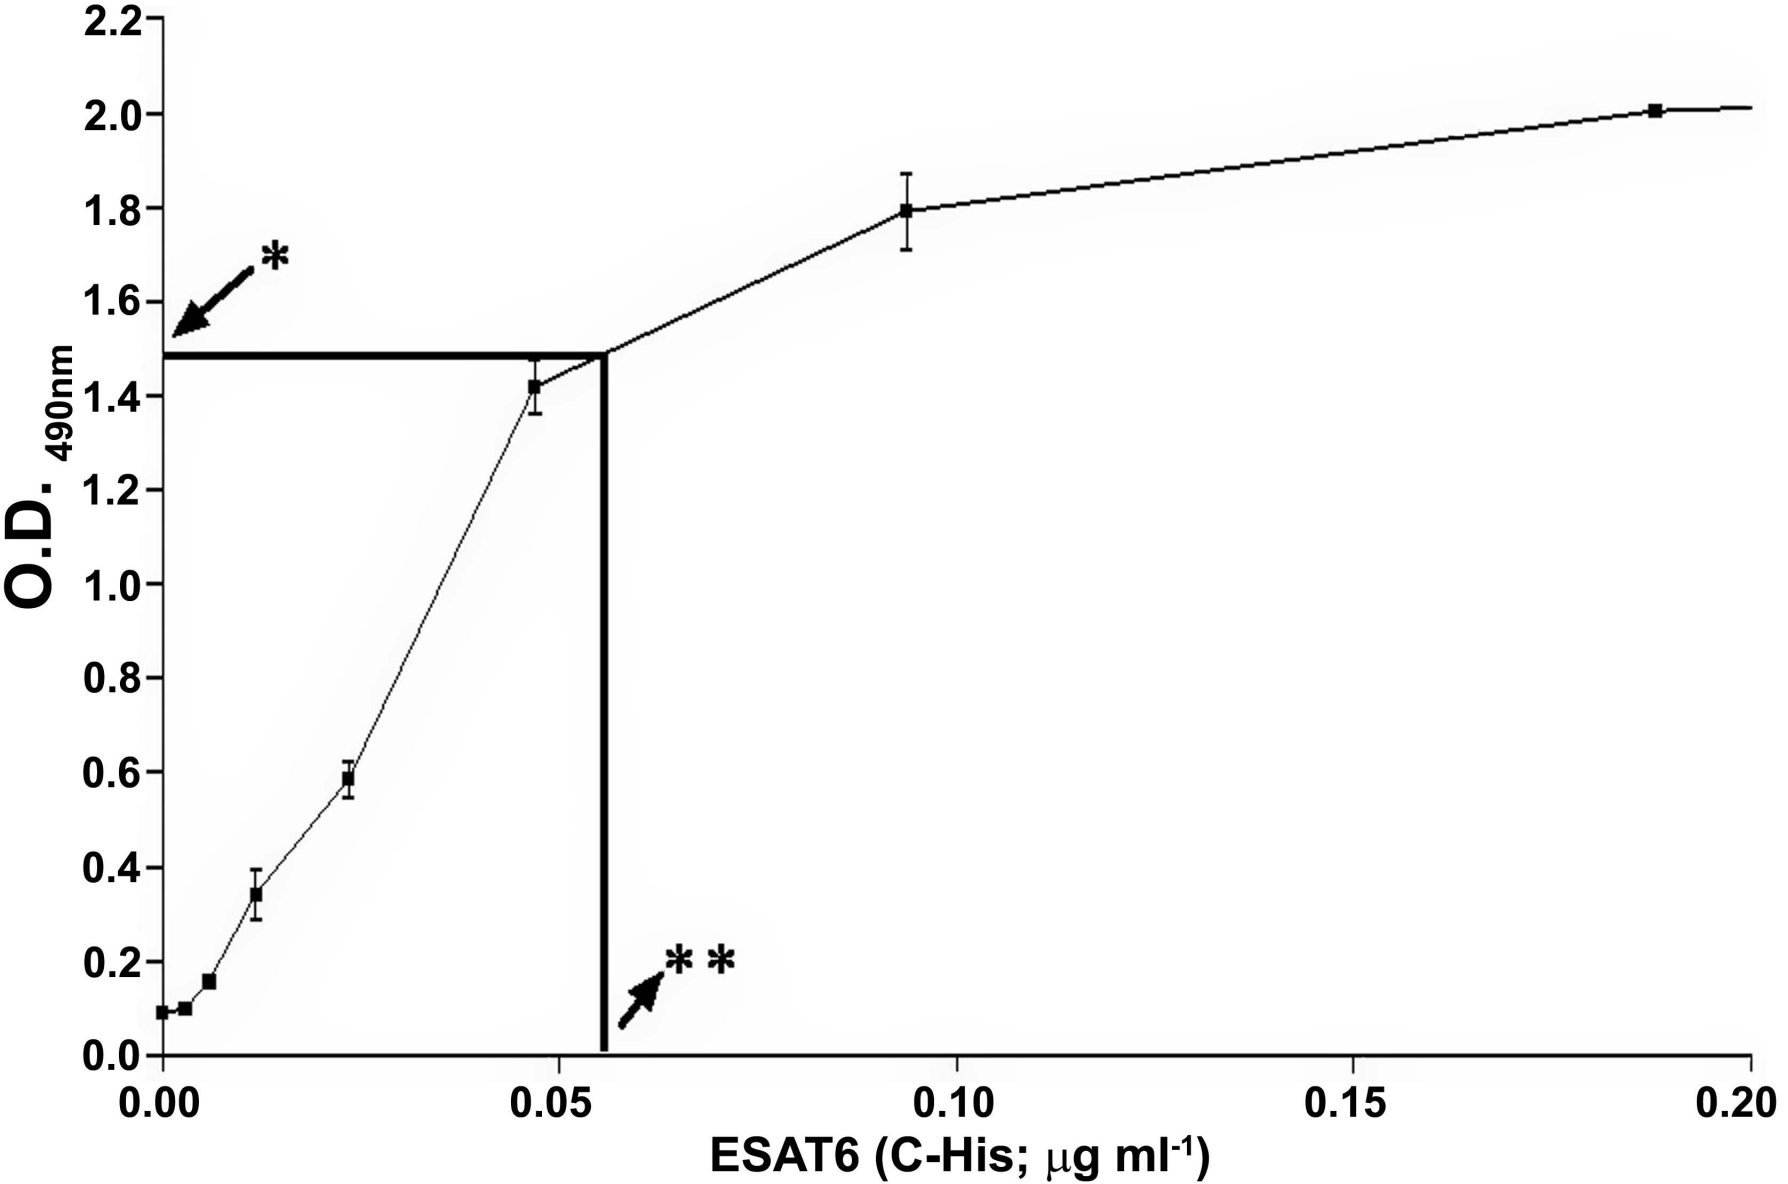

Supplement: NIHMS187553-supplement-Supplemental_Figures.pdf [file NIHMS187553-supplement-Supplemental_Figures.pdf]
